# Supplementary material for: Selection of Listeria monocytogenes InlA-Binding Peptides Using Phage Display—Novel Compounds for Diagnostic Applications?
Source: MDPI journal article supplement (doi:10.3390/applmicrobiol2040070), 2022-11-10
Supplement: s1 [file s1]

Archive with 1 entries (1 files):
- applmicrobiol-1945329-supplementary.pdf
